# Supplementary material
Source: Springer Nature journal article supplement (https://www.springermedizin.de/resource/supplementary/12936_2010_1745_MOESM3_ESM.pdf/9541590)

a)

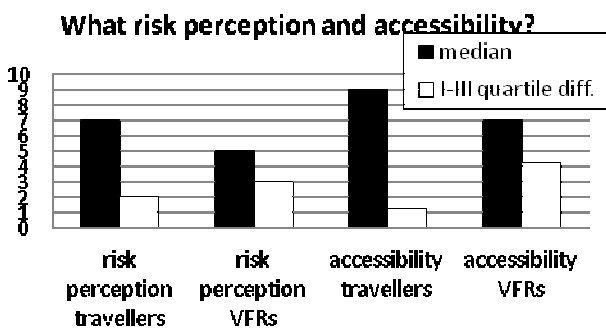

b)

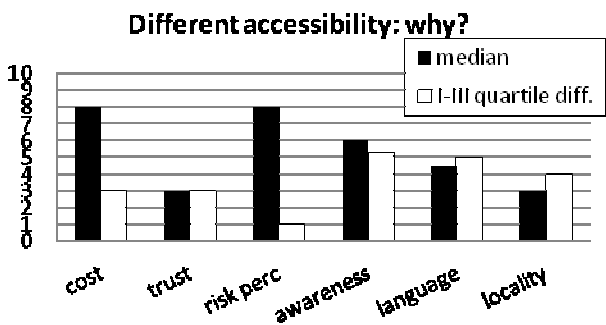

c)

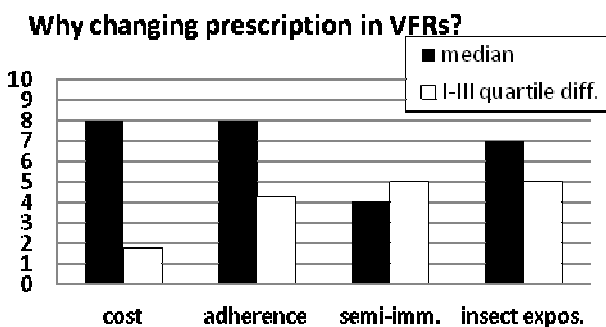

d)

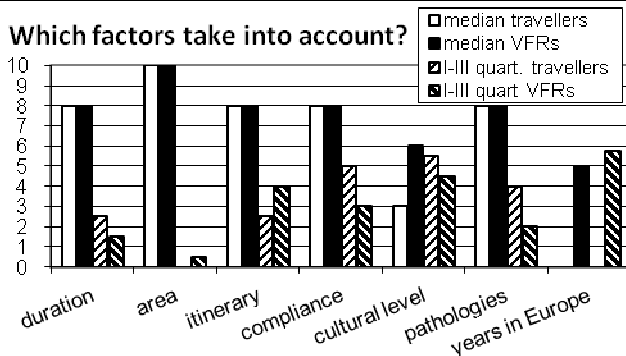

e)

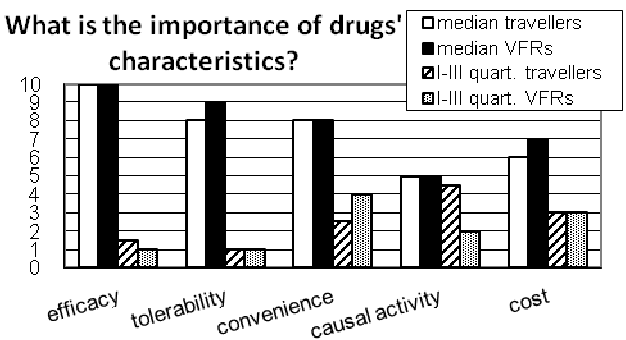

Supplement: MOESM3 [file 9541590]
